# Supplementary material
Source: PubMed Central journal article supplement (PMC4583806)
Supplement: NIHMS684842-supplement-Supp__Information.pdf [file NIHMS684842-supplement-Supp__Information.pdf]

1 **SUPPORTING INFORMATION**

2 **Figure S1. Sequence alignment of Erp proteins.** The complete amino acid sequences of Erp  
3 proteins analyzed in the present study. The red asterisks indicate the double lysine motif  
4 mutated in ErpG-KA.

5

6 **Figure S2. Mutation of double lysine residues (K-194 and K-195) of ErpG does not affect**  
7 **structure.** Far-UV CD analysis of ErpG and ErpG-KA. Molar ellipticity,  $\Phi$ , was measured from  
8 190 to 250 nm for 10 $\mu$ M of each protein in PBS buffer.

9

10 **Figure. S3. Localization of ErpG to the surface of *B. burgdorferi*** (A) *B. burgdorferi*  
11 strains B31 and B314 carrying the vector (B314/vector), or producing ErpG (B314/pErpG) or  
12 ErpG-KA (B314/pErpG-KA) were mock-treated (“-”) or treated (“+”) with proteinase K (“PK”).  
13 Bacterial lysates were then immunoblotted with anti-ErpG (“ $\alpha$ -ErpG”, top), or, as a control for  
14 outer membrane integrity, anti-flagellin (“ $\alpha$ -FlaB”, bottom). (B) Flow cytometry analysis of  
15 ErpG localized to the surface of the strain B314/vector or B314/pErpG. (C) The indicated *B.*  
16 *burgdorferi* strain was mock-treated or permeablized with methanol prior to probing with anti-  
17 ErpG or FlaB (negative control). Values are shown relative to the production levels of ErpG on  
18 the surface of *B. burgdorferi* strain B31. Each bar represents the mean of 12 independent  
19 determinations  $\pm$  SEM. (\*) Significant reduction in surface production of ErpG relative to the  
20 strain B31 is indicated (\*, P-value < 0.05).

21

1 **Figure S4. Recombinant ErpK and ErpL proteins bind to heparan sulfate.** (A) 2  $\mu$ M  
2 recombinant GST-tagged ErpK or ErpL or GST (as a negative control) were added at  
3 quadruplicate wells coated with 100 $\mu$ L of 10  $\mu$ g/mL heparin, heparan sulfate (Hep-SO<sub>4</sub>),  
4 chondroitin-4-sulfate (Chon-4-SO<sub>4</sub>), dermatan sulfate (Derm SO<sub>4</sub>), chondroitin-6-sulfate (Chon-  
5 6-SO<sub>4</sub>), fibronectin (Fn), laminin, (Ln), type I collagen (Collagen I), or type IV collagen  
6 (Collagen IV). Bound proteins were measured by ELISA (see Experimental Procedures) and  
7 mean OD<sub>405</sub>  $\pm$  standard deviation was determined. Asterisks indicate that binding of GST-ErpK  
8 or GST-ErpL to heparin or heparan sulfate was statistically ( $p \leq 0.05$  by Student's t test) different  
9 than GST. Shown is a representative of three independently performed experiments. (B) The  
10 indicated concentrations of recombinant GST-ErpK, GST-ErpL or GST were added to  
11 quadruplicate wells coated with heparan sulfate, and protein binding was quantified by ELISA  
12 and mean OD<sub>405</sub>  $\pm$  standard deviation was determined. Proteins bound to heparan sulfate  
13 significantly better than GST ( $p \leq 0.05$  by Student's t test).  $K_D$  values obtained from the average  
14 of three independent experiments were calculated and shown on in the inset. Shown is a  
15 representative of three independently performed experiments. (C) 15.625 to 500 nM of GST-  
16 tagged ErpK or ErpL was flowed over a surface coated with 10  $\mu$ g heparan sulfate. Binding was  
17 measured in response units (RU) by SPR (see Experimental Procedures). Shown is a  
18 representative of six experiments performed on three different occasions.  $K_D$  values obtained  
19 from the average of three independent experiments were calculated and shown on in the inset,  
20 and in Table 1 are the  $k_{on}$ ,  $k_{off}$ , and  $K_D$  values obtained from average of these.

21

22

1 **Table S1. Bacterial strains and plasmids used in this study.**

| Strain or Plasmid                  | Genotype or characteristics                                                                                                                                                                | Reference(s) or source                              |
|------------------------------------|--------------------------------------------------------------------------------------------------------------------------------------------------------------------------------------------|-----------------------------------------------------|
| <i>B. burgdorferi</i> strains      |                                                                                                                                                                                            |                                                     |
| B31                                | <i>B. burgdorferi</i> strain B31 isolated from the tick in New York. The isolate used in this study was acquired from P. Rosa in 1997.                                                     | (Barbour, 1984)<br>(Stevenson <i>et al.</i> , 1996) |
| B314                               | High-passage <i>B. burgdorferi</i> B31 derivative missing lp5, lp16, lp17, lp21, lp25, lp28-1, lp28-2, lp28-3, lp28-4, lp36, lp29, lp38, lp49, lp54, lp56, cp9, cp32-6, cp32-7, cp32-9.    | (Sadziene <i>et al.</i> , 1993)                     |
| B314/pJF21                         | B314 harboring pJF21 vector                                                                                                                                                                | (Fischer <i>et al.</i> , 2006)                      |
| B314/pJF21-ErpG                    | B314 harboring pErpG vector                                                                                                                                                                | This study                                          |
| B314/pJF21-ErpG-KA                 | B314 harboring pErpG-KA vector                                                                                                                                                             | This study                                          |
| <i>E. coli</i> strains             |                                                                                                                                                                                            |                                                     |
| DH10B                              | F <sup>-</sup> <i>mcrA</i> Δ( <i>mrr-hsdRMS-mcrBC</i> ) φ80 <i>lacZ</i> ΔM15 Δ <i>lacX74 recA1 endA1 araD139</i> Δ( <i>ara, leu</i> )7697 <i>galU galK</i> λ <sup>-</sup> <i>rpsL nupG</i> | Invitrogen                                          |
| BL21                               | F <sup>-</sup> , <i>ompT, hsdSB</i> (rB <sup>-</sup> , mB <sup>-</sup> ), <i>dcm, gal, λ</i> (DE3)                                                                                         | Promega                                             |
| XL1-blue                           | <i>recA1 endA1 gyrA96 thi-1 hsdR17 supE44 relA1 lac</i> [F' <i>proAB lacI<sup>q</sup>ZΔM15 Tn10 (Tet<sup>r</sup>)</i> ].                                                                   | Stratagene                                          |
| BL21/pGEX4T2-OspF related proteins |                                                                                                                                                                                            |                                                     |
| BL21/pGEX4T2-ErpL                  | BL21 producing ErpL from <i>B. burgdorferi</i> strain B31                                                                                                                                  | This study                                          |
| BL21/pGEX4T2-ErpG                  | BL21 producing ErpG from <i>B. burgdorferi</i> strain B31                                                                                                                                  | This study                                          |
| BL21/pGEX4T2-ErpG-KA               | BL21 producing ErpG from <i>B. burgdorferi</i> strain B31, with lysine-194 and -195 replaced by alanine                                                                                    | This study                                          |

|                                    |                                                                                                                                                         |                                |
|------------------------------------|---------------------------------------------------------------------------------------------------------------------------------------------------------|--------------------------------|
| BL21/pGEX4T2-ErpY                  | BL21 producing ErpY from <i>B. burgdorferi</i> strain B31                                                                                               | This study                     |
| BL21/pGEX4T2-Erp25                 | BL21 producing Erp25 from <i>B. burgdorferi</i> strain N40-D10/E9                                                                                       | This study                     |
| BL21/pGEX4T2-Erp27                 | BL21 producing Erp27 from <i>B. burgdorferi</i> strain N40-D10/E9                                                                                       | This study                     |
| BL21/pGEX4T2-OspF                  | BL21 producing OspF from <i>B. burgdorferi</i> strain 297                                                                                               | This study                     |
| BL21/pGEX4T2-ErpK                  | BL21 producing ErpK from <i>B. burgdorferi</i> strain B31                                                                                               | This study                     |
| BL21/pGEX4T2-OspE related proteins |                                                                                                                                                         |                                |
| BL21/pGEX4T2-ErpP                  | BL21 producing ErpP from <i>B. burgdorferi</i> strain B31                                                                                               | This study                     |
| BL/pGEX4T2-Elp proteins            |                                                                                                                                                         |                                |
| BL21/pGEX4T2-ErpX                  | BL21 producing ErpX from <i>B. burgdorferi</i> strain B31                                                                                               | This study                     |
| Plasmids                           |                                                                                                                                                         |                                |
| pCR2.1-TOPO                        | AmpR <sup>a</sup> , KanR <sup>b</sup> ; PCR cloning vector                                                                                              | Invitrogen                     |
| pBSV2                              | KanR <sup>b</sup> ; borrelial shuttle vector                                                                                                            | (Stewart <i>et al.</i> , 2001) |
| pJF21                              | KanR <sup>b</sup> ; pBSV2-derived shuttle vector containing the <i>ospC</i> promoter                                                                    | (Fischer <i>et al.</i> , 2006) |
| pErpG                              | pBSV2 carrying <i>erpG</i> from <i>B. burgdorferi</i> strain B31 under the control of the <i>ospC</i> promoter from <i>B. burgdorferi</i> strain B31    | This study                     |
| pErpG-KA                           | pBSV2 carrying <i>erpG-KA</i> from <i>B. burgdorferi</i> strain B31 under the control of the <i>ospC</i> promoter from <i>B. burgdorferi</i> strain B31 | This study                     |

1 <sup>a</sup>AmpR, Ampicillin resistance

1 <sup>b</sup>KanR, Kanamycin resistance

2

3

4

5

6

7

8

9

10

11

12

13

14

15

16

17

18

1 **Table S2. Primers used in this study.**

| Primer/Vector                                           | Sequence*                    | Amplified DNA fragment |
|---------------------------------------------------------|------------------------------|------------------------|
| The primers for genes encoding OspF related proteins    |                              |                        |
| ErpKpfp/pGEX4T2                                         | cgGGATTCgatgtaaaaaaagtta     | <i>erpKp</i>           |
| ErpKprp/pGEX4T2                                         | cgGTCGACctattctttttattaga    |                        |
| ErpLpfp/pGEX4T2                                         | cgGGATCCaatctaaaaaattcagaa   | <i>erpLp</i>           |
| ErpLprp/pGEX4T2                                         | cgGTCGACttattctttttatcttc    |                        |
| Erp25pfp/pGEX4T2                                        | cgGGATCCgatataaaacaaaatgta   | <i>erp25p</i>          |
| Erp25prp/pGEX4T2                                        | cgGTCGACctattctctttattatt    |                        |
| ErpGpfp/pGEX4T2                                         | cgGGATCCagtgaagatttaaacia    | <i>erpGp</i>           |
| ErpGprp/pGEX4T2                                         | cgGTCGACttattttttatcttctat   |                        |
| ErpYpfp/pGEX4T2                                         | cgGGATCCgtaactagtaaagattta   | <i>erpYp</i>           |
| ErpYprp/pGEX4T2                                         | cgGTCGACttattctttttaccttc    |                        |
| OspFpfp/pGEX4T2                                         | cgGTCGACccgatttagaagggtcagtg | <i>ospFp</i>           |
| OspFprp/pGEX4T2                                         | cgGCGGCCGCttattctttttgacttc  |                        |
| Erp27pfp/pGEX4T2                                        | cgGGATCCaaaggtgtaaaggggca    | <i>erp27p</i>          |
| Erp27prp/pGEX4T2                                        | cgGTCGACttattctttttctcttc    |                        |
| The primers for the gene encoding OspE related proteins |                              |                        |
| ErpPpfp/pGEX4T2                                         | cgGGATCCtatgatgagcaaagt      | <i>erpPp</i>           |
| ErpPprp/pGEX4T2                                         | cgGTCGACctatttttaattttt      |                        |
| The primers for the gene encoding Elp proteins          |                              |                        |
| ErpXpfp/pGEX4T2                                         | cgGGATCCggtaaagatgcaact      | <i>erpXp</i>           |
| ErpXprp/pGEX4T2                                         | cgGTCGACttactgactgtaact      |                        |

|                 |                                                                          |                             |
|-----------------|--------------------------------------------------------------------------|-----------------------------|
| ErpPpfp/pGEX4T2 | cg <u>GGATCC</u> tatgatgagcaaagt                                         | <i>erpPp</i>                |
| ErpPprp/pGEX4T2 | cg <u>GTCGAC</u> Ctattttaaat                                             |                             |
| pErpGfp/pJF21   | cg <u>GTCGAC</u> atgaataagaaatgaaa                                       | <i>erpG</i>                 |
| pErpGrp/pJF21   | cg <u>GGATCC</u> tattttttatcttctat                                       |                             |
| ErpG-KAp1       | cttctaattcggcagctcttttctattttatccttaattc<br>ttgaattcttttcttctctttt       | <i>erpG-KA and erpG-KAp</i> |
| ErpG-KAp2       | tcaagaattaaaggataaaatagataaaagagctgcc<br>gaattagaagaggctagaaagaattcaagaa |                             |
| ErpG-KAp3       | atttcttttcttctcttctt                                                     |                             |
| ErpG-KAp4       | aggctagaaagaattcaagaa                                                    |                             |
| Kanfp           | atgagccatattcaacgggaa                                                    | <i>kan</i>                  |
| Kanrp           | ttagaaaaactcatcgagcat                                                    |                             |

---

1 \* Restriction sites used are shown in capital letters.

2
